# Supplementary material for: Downregulated RBM5 Enhances CARM1 Expression and Activates the PRKACA/GSK3β Signaling Pathway through Alternative Splicing-Coupled Nonsense-Mediated Decay
Source: MDPI journal article supplement (doi:10.3390/cancers16010139), 2023-12-27
Supplement: s1 [file s1]

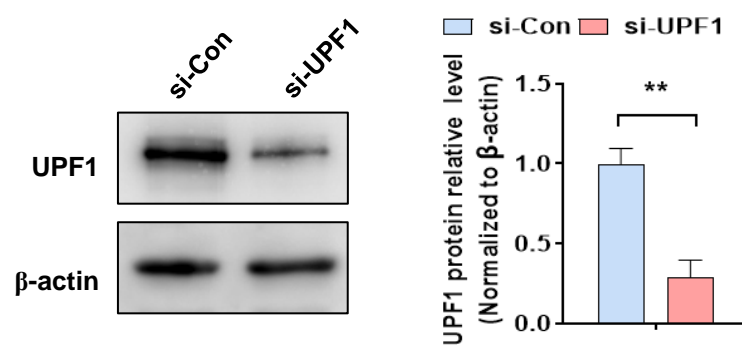

**Supplementary Figure S1** T24 cell transfected with si-UPF1 or si-Con and Western blot was used to examine UPF1 protein expression.

**Supplementary Table 1 Primers used in this study.**

| Name           | Sequences                          |
|----------------|------------------------------------|
| TBC1D3G-F:     | TACGAAAAGGGACACCGAGC               |
| TBC1D3G-R:     | TCTCCCAGCATATCCACCCA               |
| RADIL-F:       | ACAGCCTGGTGTATGTGCTC               |
| RADIL-R:       | CCCACCTCGGAGAAGTTGAC               |
| KCNJ18-F:      | CAGTCAGCTTTCCGTCCTGT               |
| KCNJ18-R:      | AGTAGTGGCTGCCATTTCCC               |
| LLPHP3-F:      | GCGTGATCCTGAAGTGTGTG               |
| LLPHP3-R:      | TGGCAATGTTTGGGTTTGGG               |
| KISS1R-F:      | TCAGCATCTGGGTAGGCTCT               |
| KISS1R-R:      | CCAGCACCTGCCCCTG                   |
| MANSC4-F:      | AAGCATGGGGTGGACATCAG               |
| MANSC4-R:      | AGGATGGAGCCTCTGTGGAT               |
| PROX2-F:       | CACATCCTACAGGCTGCCAA               |
| PROX2-R:       | TGCAGCGGTTGAACTTTTGT               |
| CARM1-F:       | ATCGCCCTCTACAGCCATGA               |
| CARM1-R:       | ACTGGATGAGGACGCTGTTG               |
| NLRP14-F:      | ACTCTCAGGCTGGAATCTTGC              |
| NLRP14-R:      | AGCTTCTGGGCTTCCTCATCA              |
| FAM124A-F:     | CTCCACGAGCAGTGAGCTTT               |
| FAM124A-R:     | GTCGTAGCGACAGTAGACGG               |
| GAPDH-F:       | TGCACCACCAACTGCTTAGC               |
| GAPDH-R:       | GGCATGGACTGTGGTCATGAG              |
| PRKACA-prom-F: | GTCACGCGTgtctccgggccagggtcagggaccc |
| PRKACA-prom-R: | GCA/AGCTTgacgccccgcagccgccc        |
| CARM1-CDS-F:   | GGCAGCCTGTGGTG <b>GACACATTTG</b>   |
| CARM1-CDS-R:   | ATGGAGCCGATGAAAGCAACGTC            |
| CARM1-E9M-F:   | GCCTGTGGTG <b>GATAGAAATCC</b>      |
| CARM1-E9M-R:   | ATGGAGCCGATGAAAGCAACG              |
| T7-F           | TAATACGACTCACTATAGGG               |
| BGH-R          | TAGAAGGCACAGTCGAGG                 |
| pcDNA3.1-R     | TCCACTAGTCCAGTGTGGTG               |
| V5-R           | GAGGGTTAGGGATAGGCTTAC              |
| Si-Con-F:      | UUCUCCGAACGUGUCACGUTT              |
| Si-Con-R:      | ACGUGACACGUUCGGAGAATT              |
| Si-UPF1-F:     | GCGUCAUCAUUGUGGGCAATT              |
| Si-UPF1-R:     | UUGCCCACAAUGAUGACGCTT              |
