# Supplementary material for: Downregulated RBM5 Enhances CARM1 Expression and Activates the PRKACA/GSK3β Signaling Pathway through Alternative Splicing-Coupled Nonsense-Mediated Decay
Source: MDPI journal article supplement (doi:10.3390/cancers16010139), 2023-12-27
Supplement: s1 [file s1]

## Supplementary materials

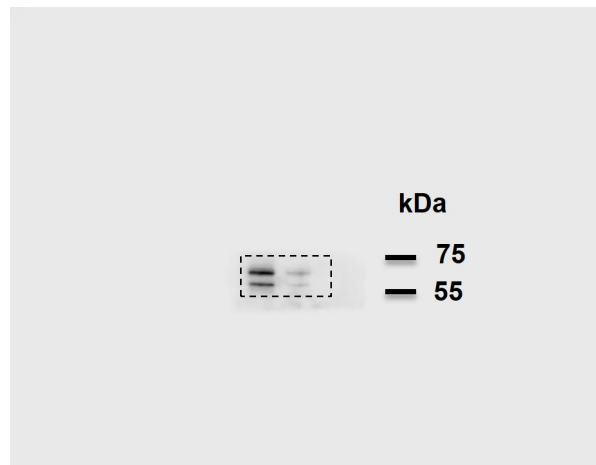

**CARM1**

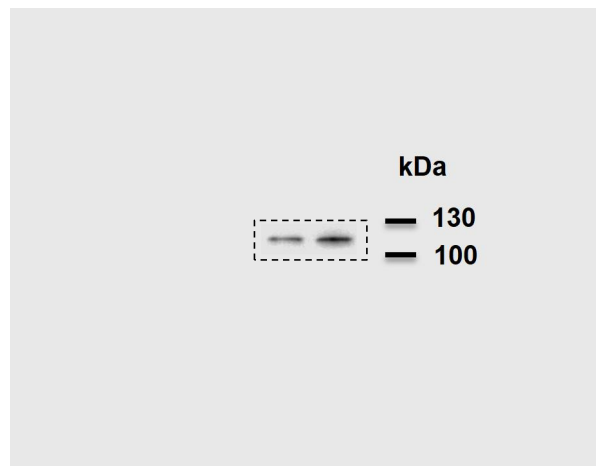

**RBM5**

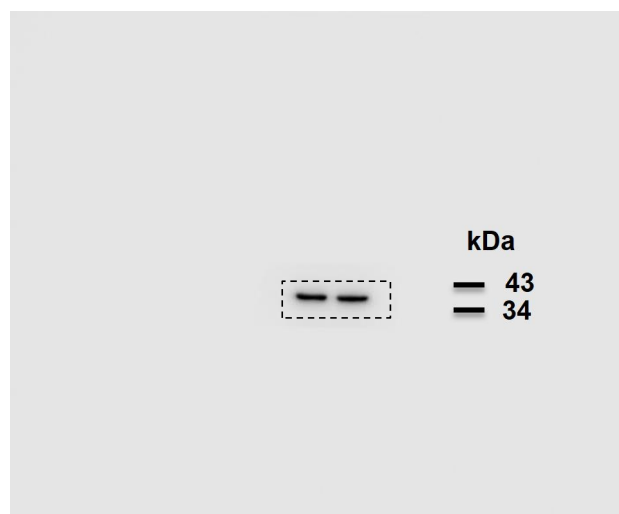

**$\beta$ -actin**

**Supplementary Figure S2.** The original immunoblots of Figure 1D.

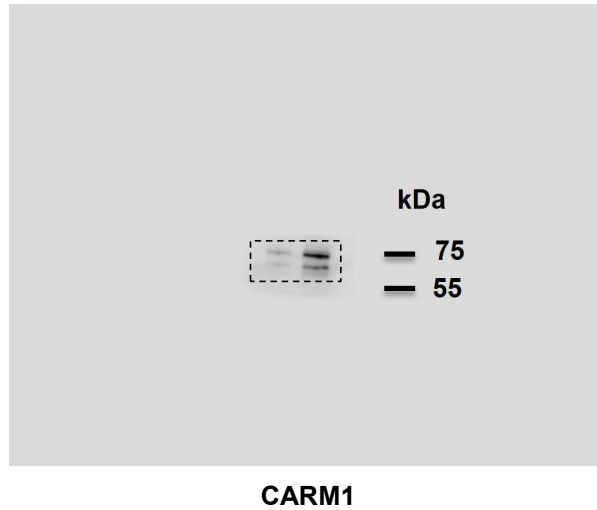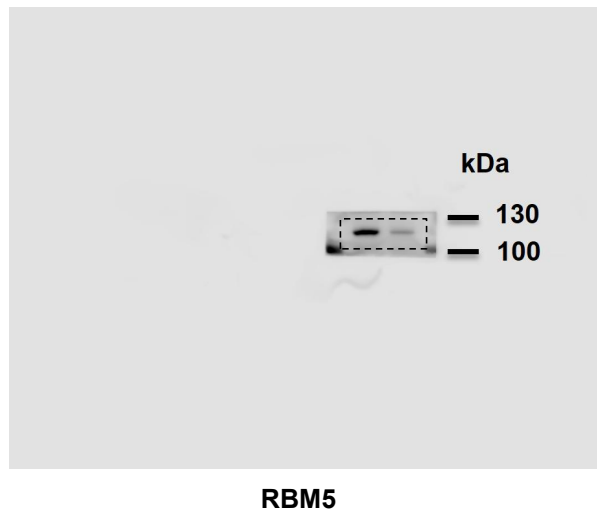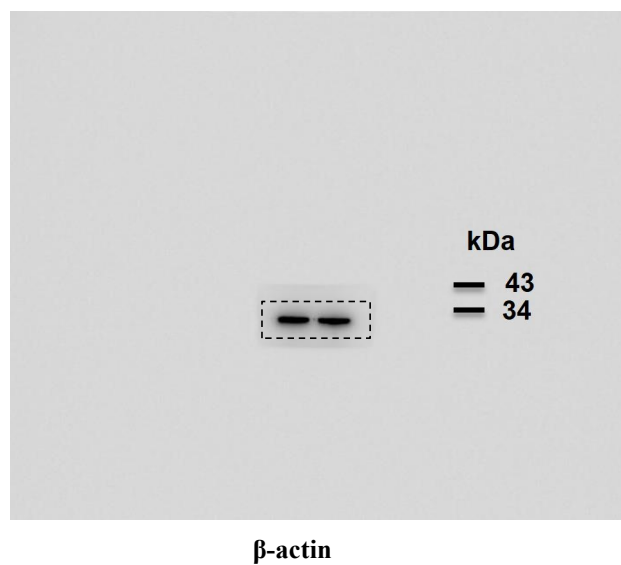

**Supplementary Figure S3.** The original immunoblots of Figure 1F.

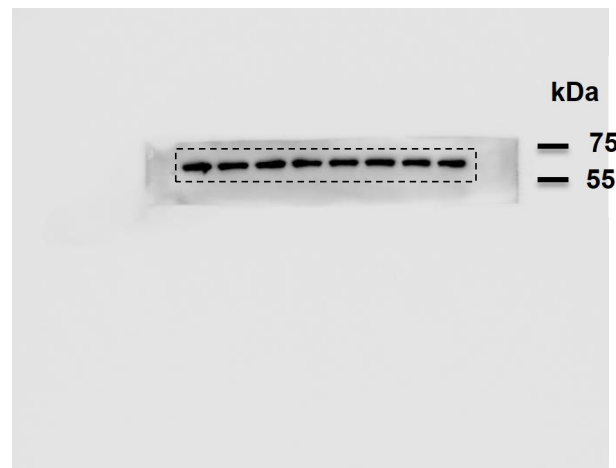

**CARM1**

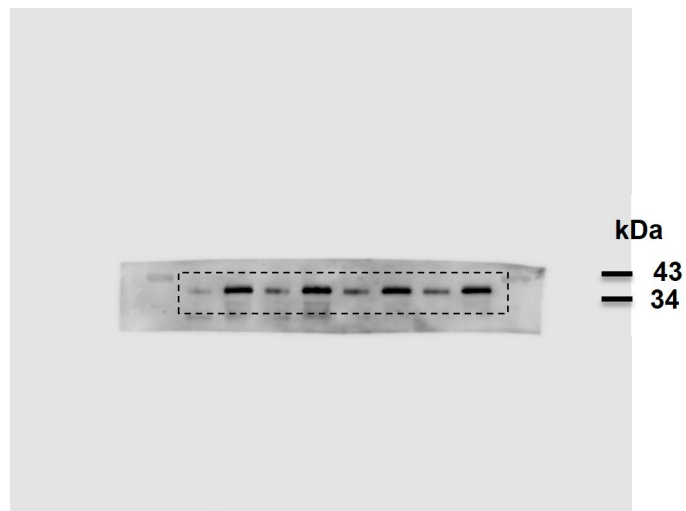

**$\beta$ -actin**

**Supplementary Figure S4.** The original immunoblots of Figure 1J.

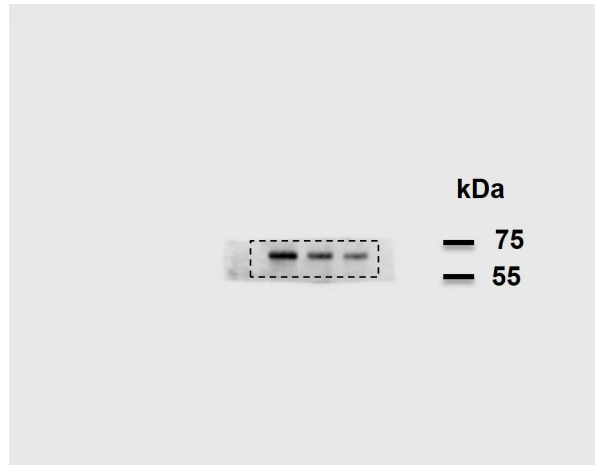

**CARM1**

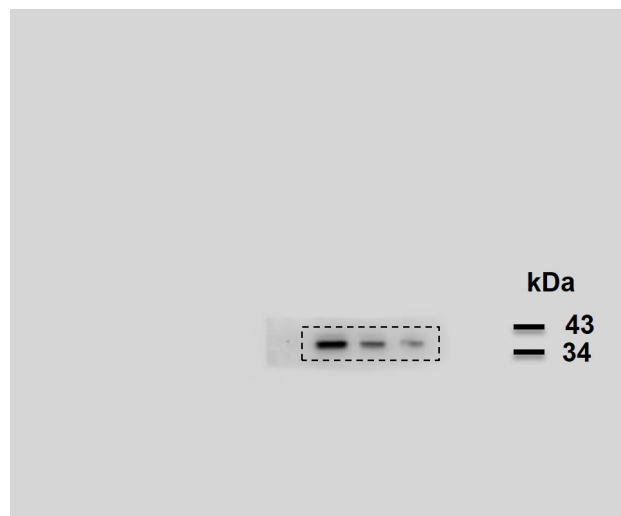

**CDK4**

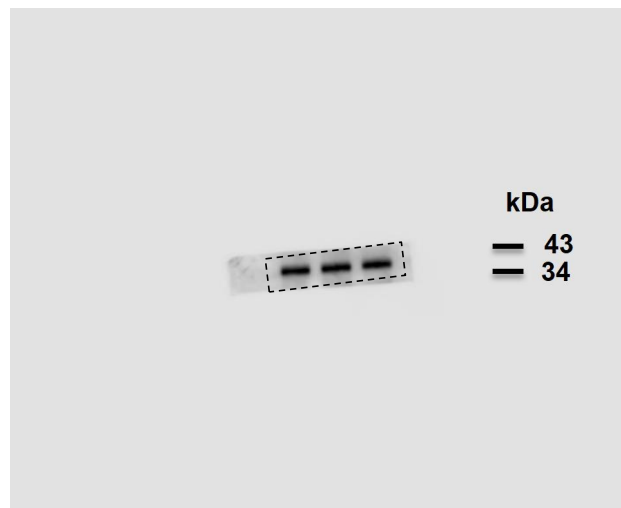

**$\beta$ -actin**

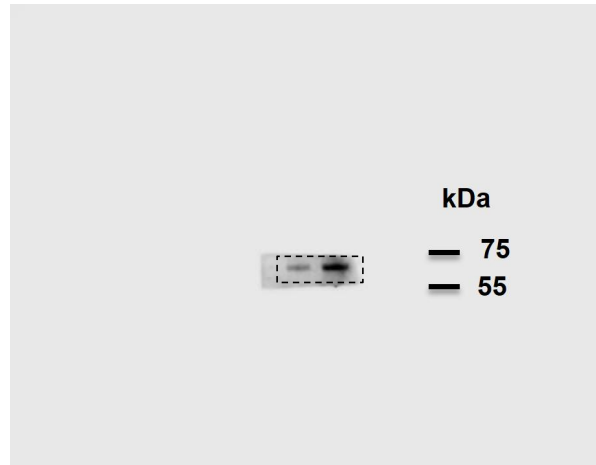

**CARM1**

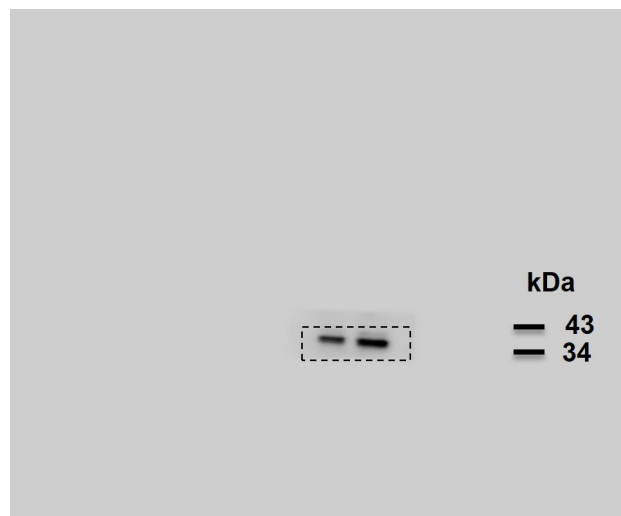

**CDK4**

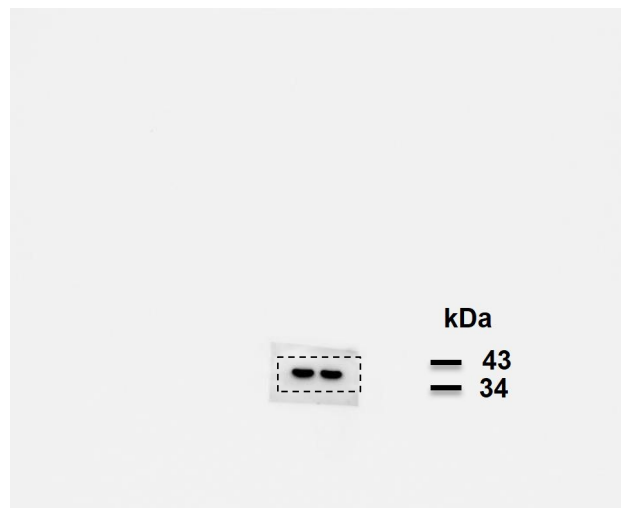

**$\beta$ -actin**

**Supplementary Figure S5.** The original immunoblots of Figure 2A.

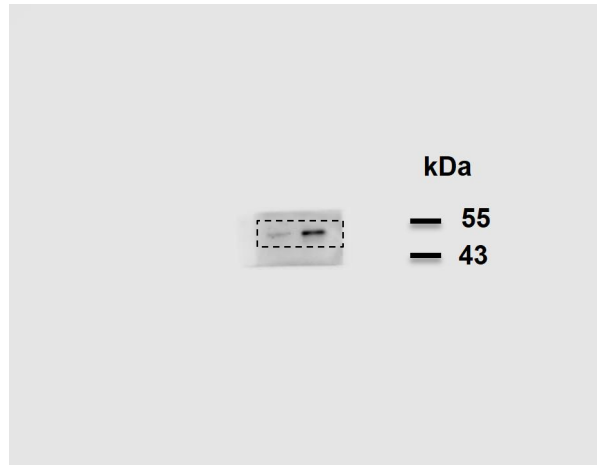

**pGSK3β**

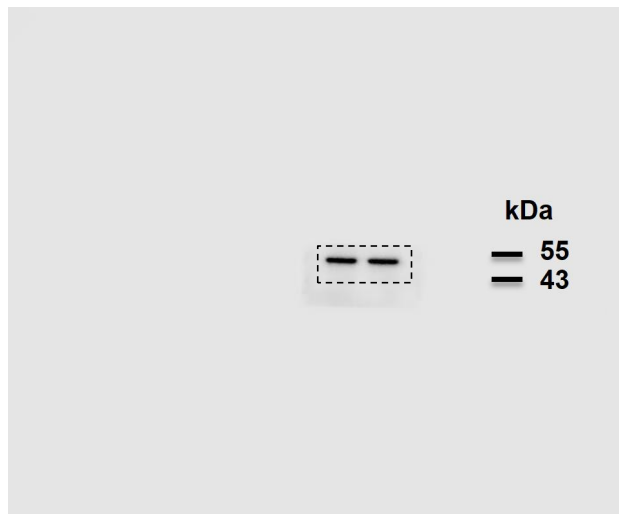

**GSK3β**

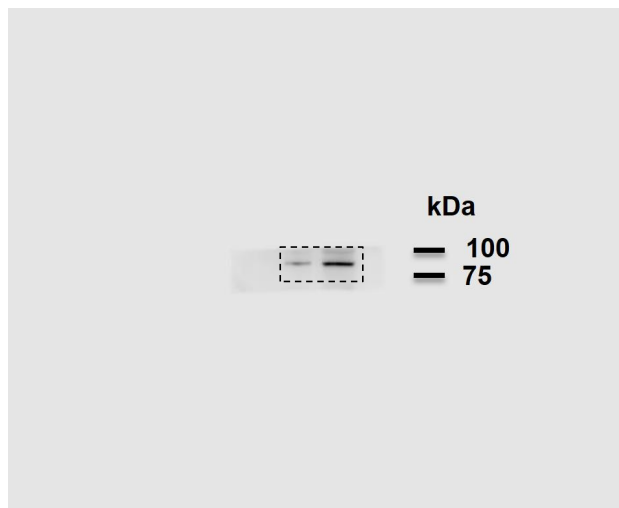

**β-catenin**

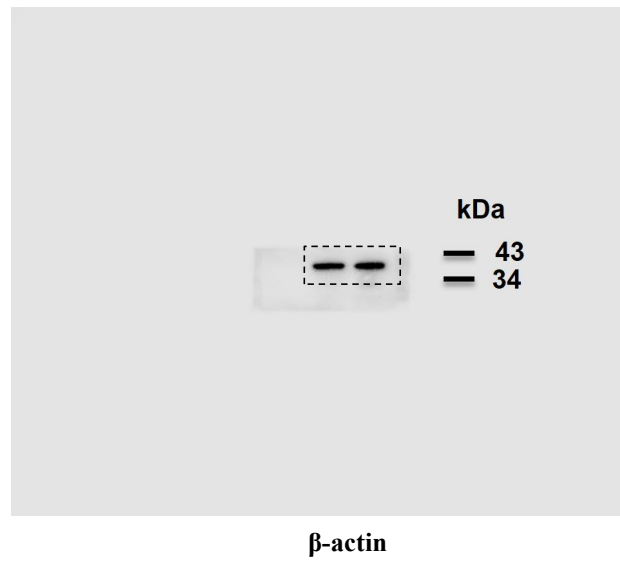

**Supplementary Figure S6.** The original immunoblots of Figure 3A.

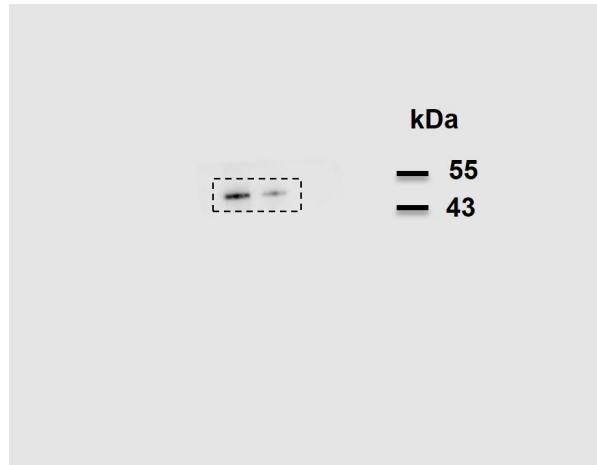

pGSK3β

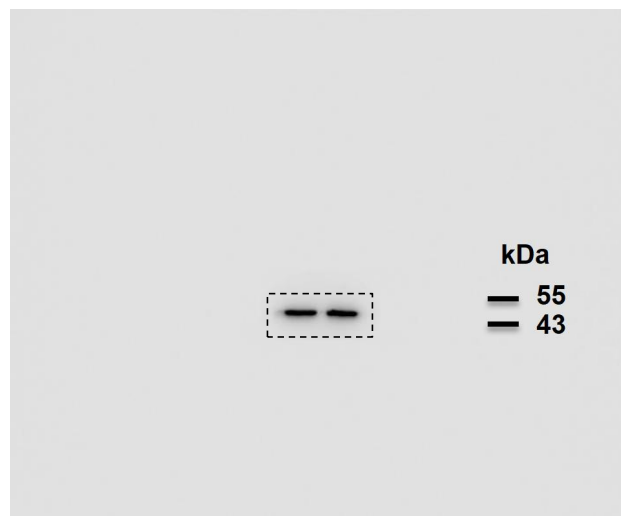

GSK3β

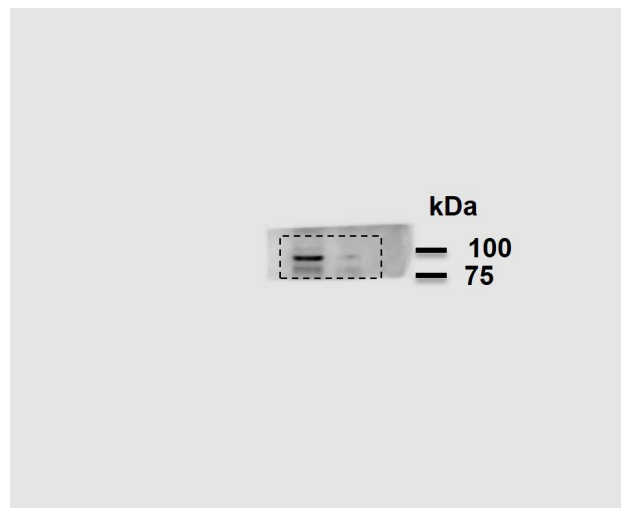

β-catenin



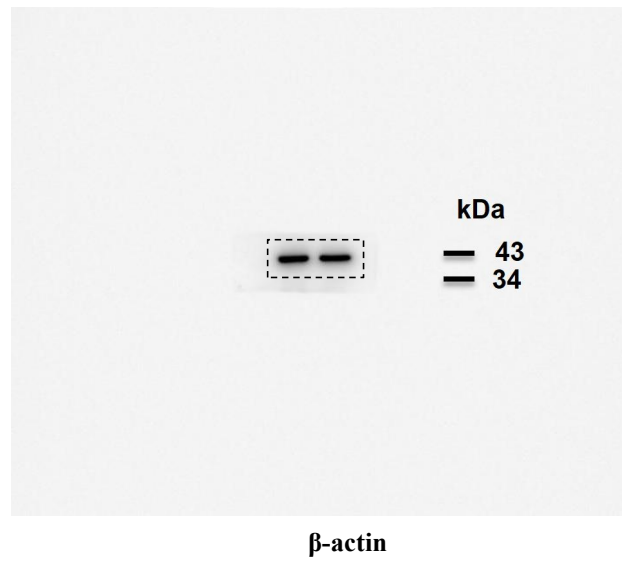

**Supplementary Figure S7.** The original immunoblots of Figure 3C.

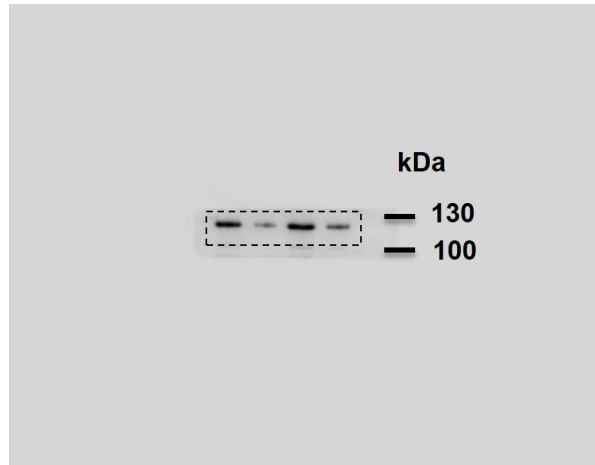

**RBM5**

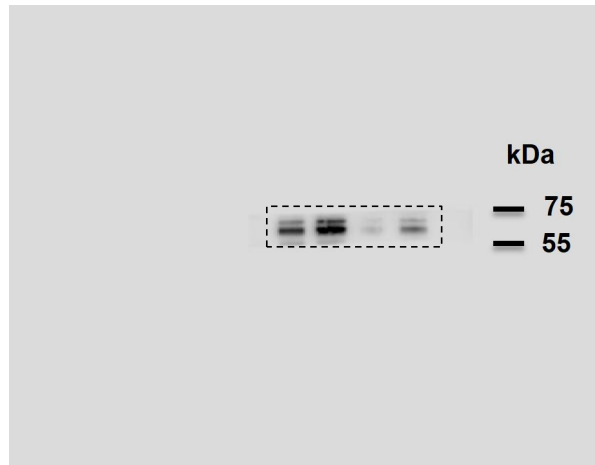

**CARM1**

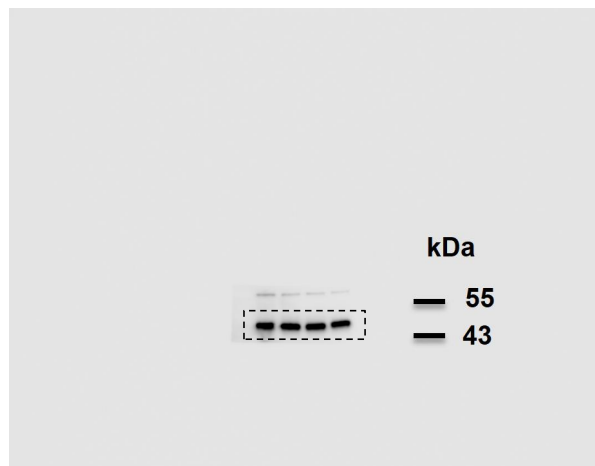

**pGSK3β**

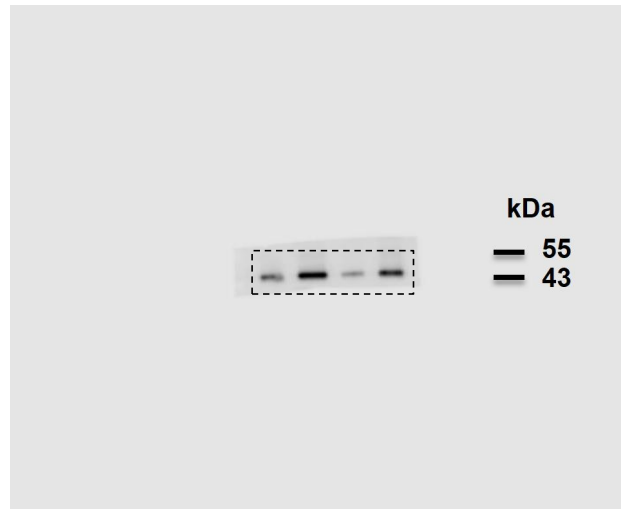

**GSK3 $\beta$**

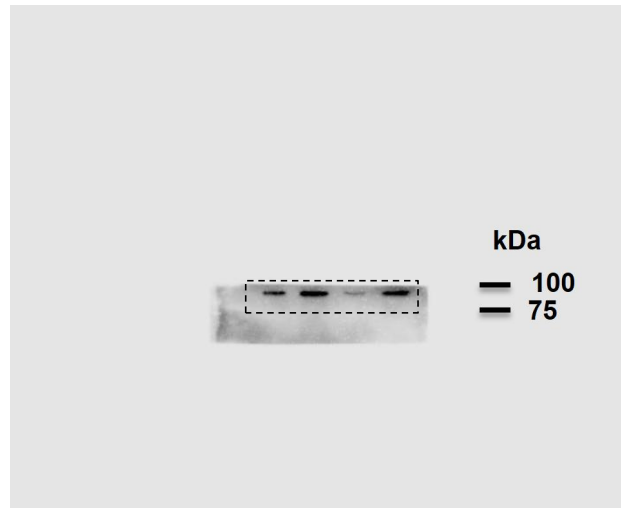

**$\beta$ -catenin**

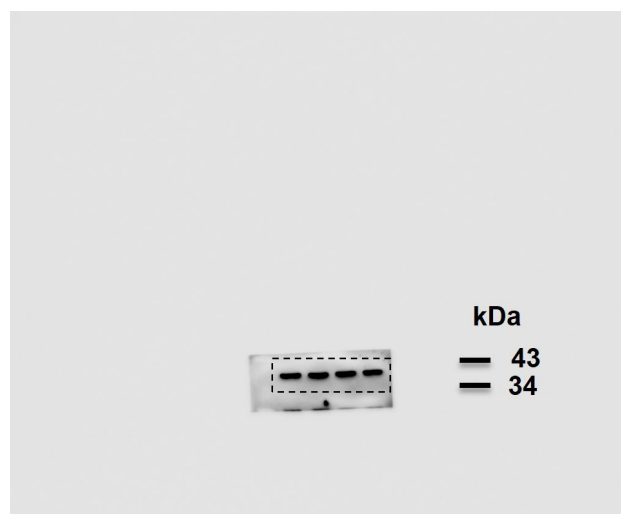

**$\beta$ -actin**

**Supplementary Figure S8.** The original immunoblots of Figure 3E.

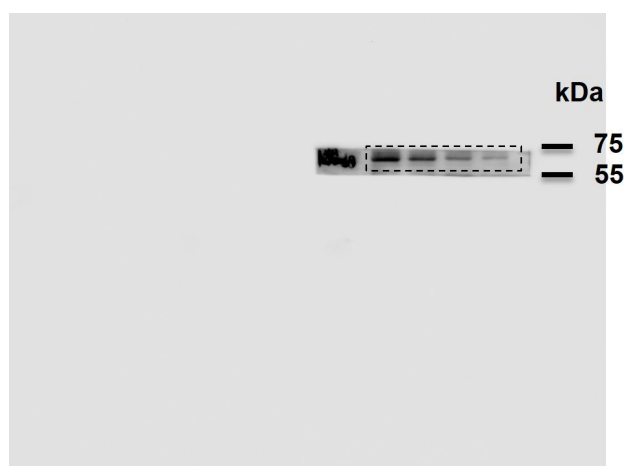

**CARM1**

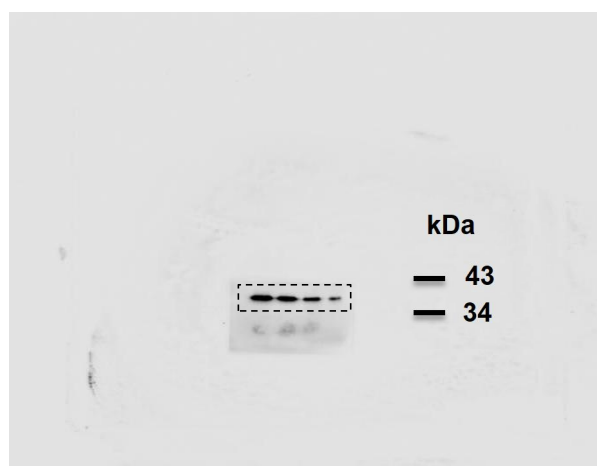

**CDK4**

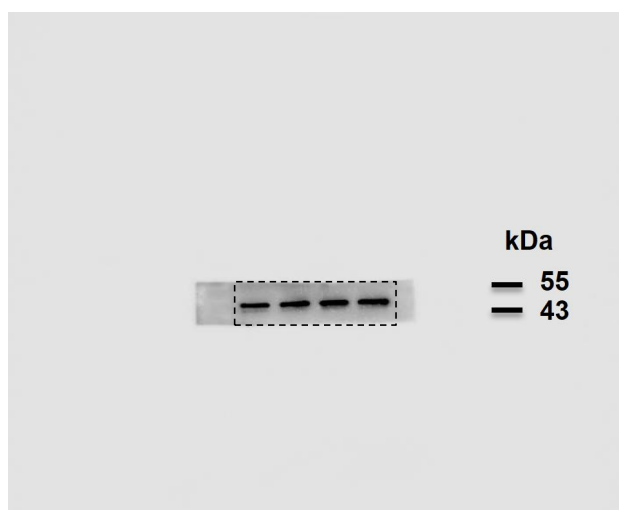

**GSK3 $\beta$**

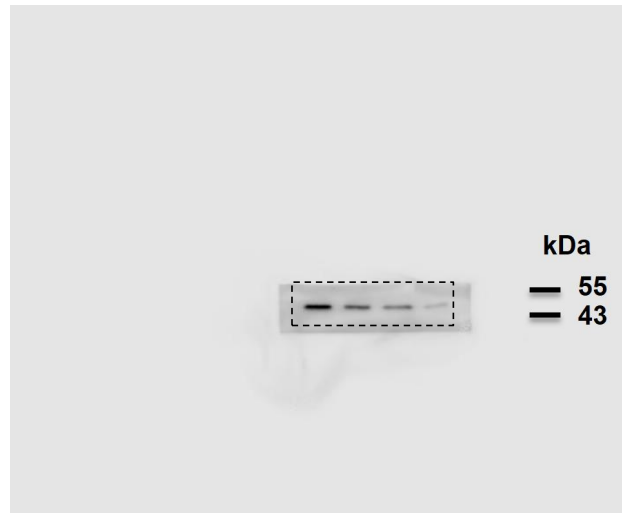

pGSK3 $\beta$

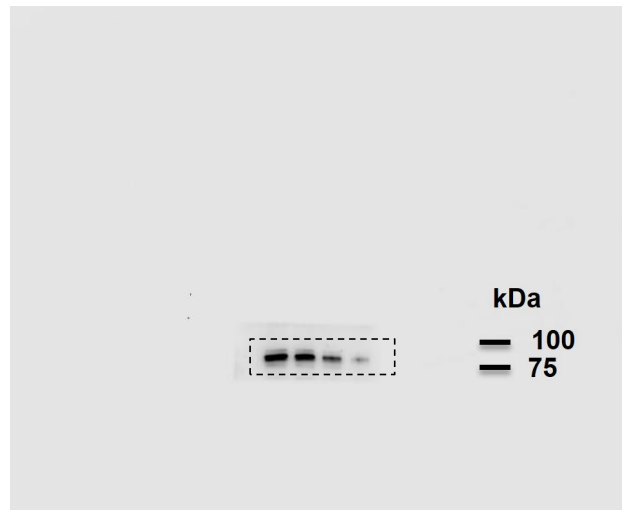

$\beta$ -catenin

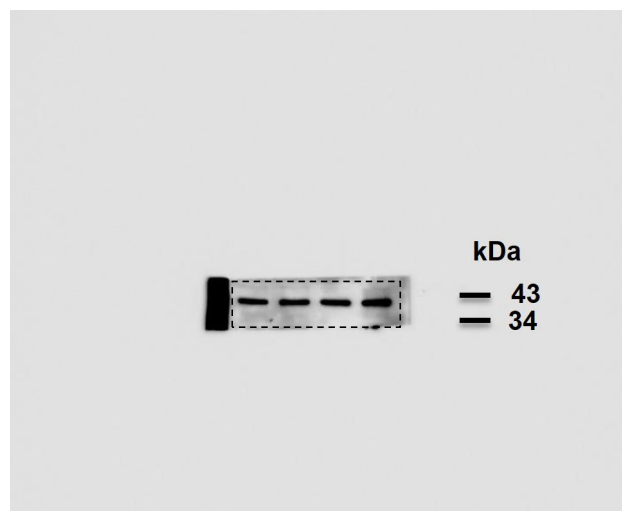

$\beta$ -actin

**Supplementary Figure S9.** The original immunoblots of Figure 3G.

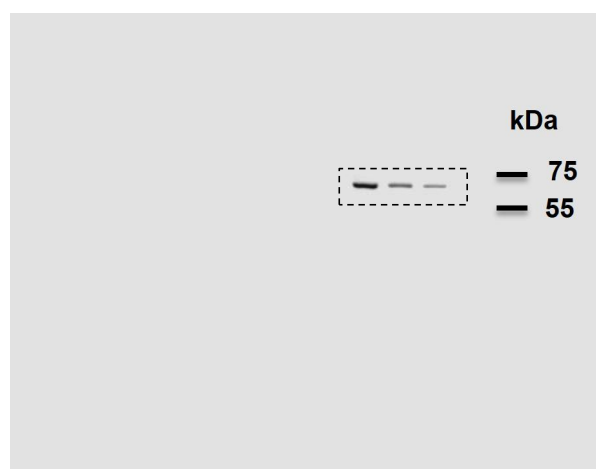

**CARM1**

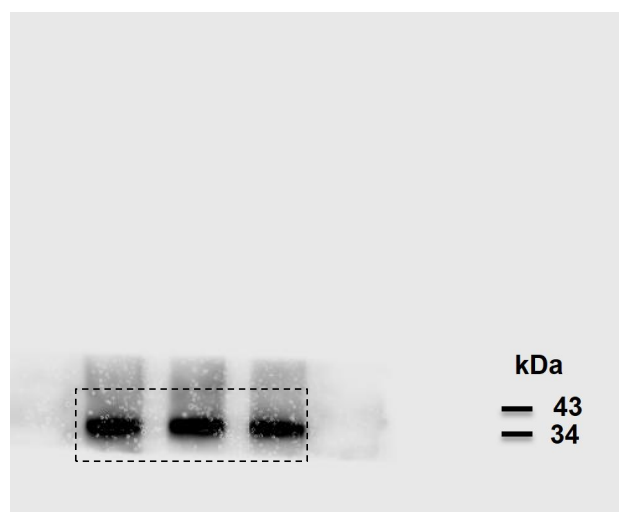

**$\beta$ -actin**

**Supplementary Figure S10.** The original immunoblots of Figure 4E.

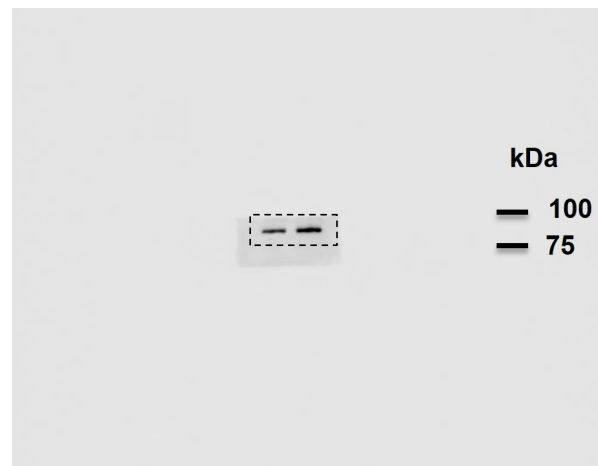

**PRKACA**

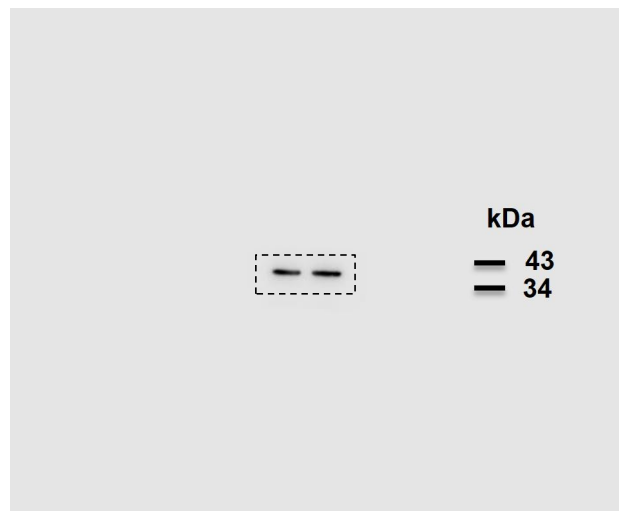

**$\beta$ -actin**

**Supplementary Figure S11.** The original immunoblots of Figure 5C.

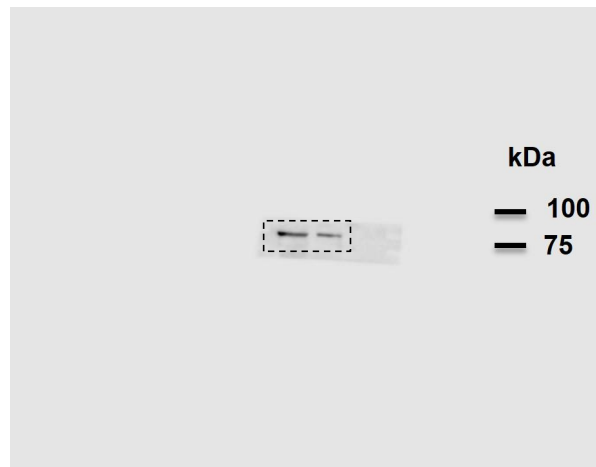

**PRKACA**

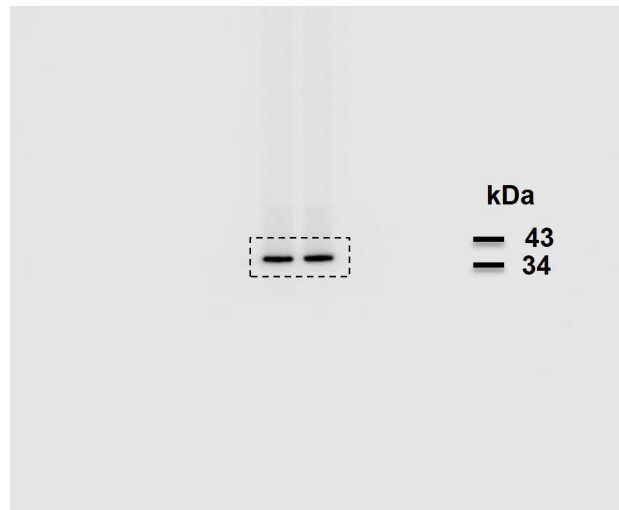

**$\beta$ -actin**

**Supplementary Figure S12.** The original immunoblots of Figure 5E.



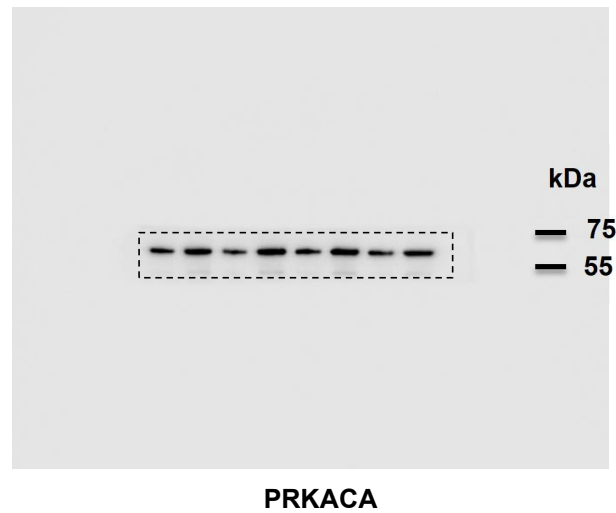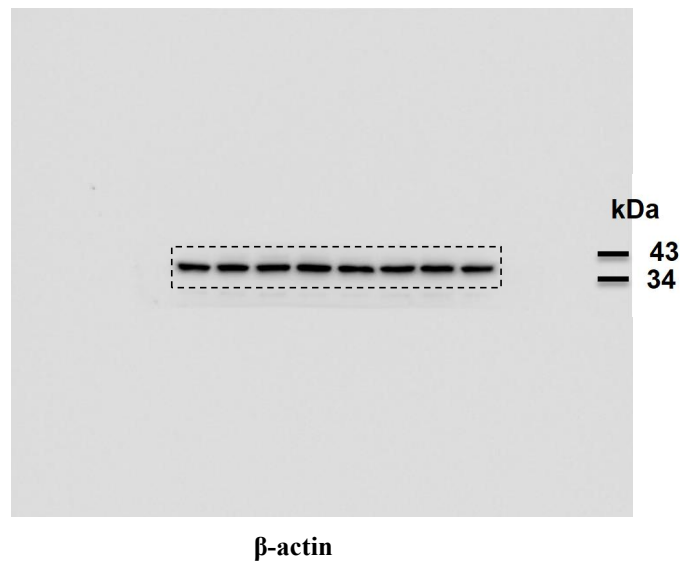

**Supplementary Figure S13.** The original immunoblots of Figure 5H.

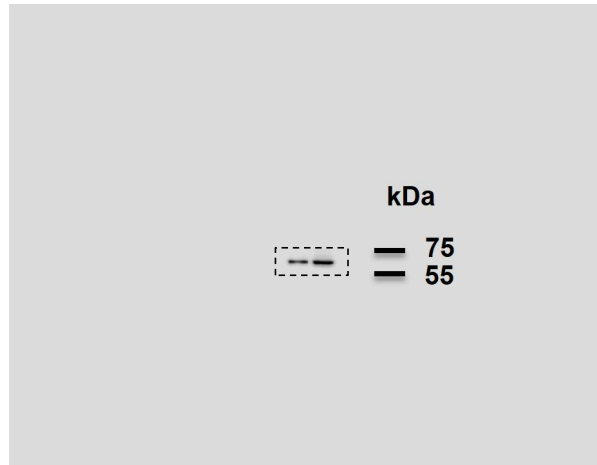

**PRKACA**

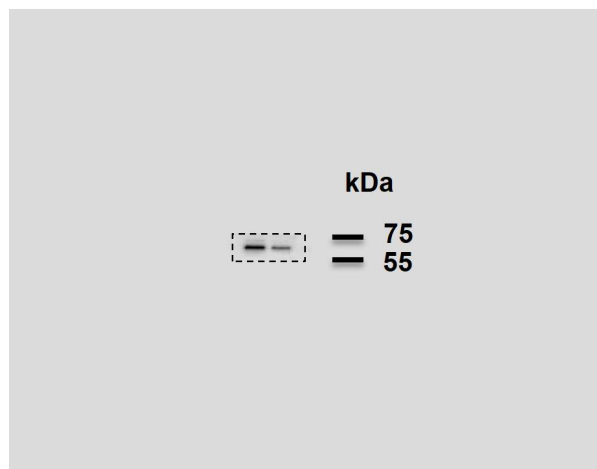

**PRKACA**

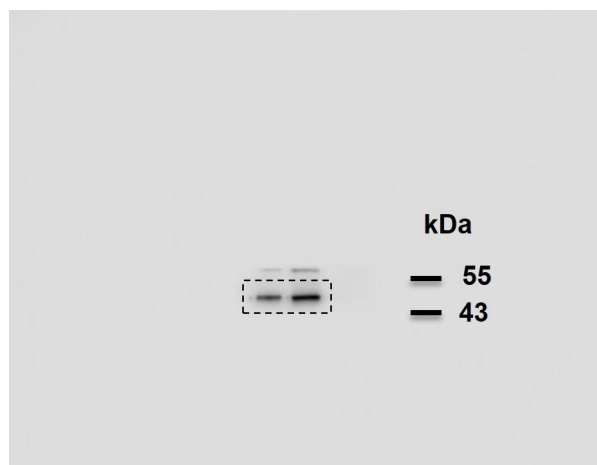

**pGSK3β**

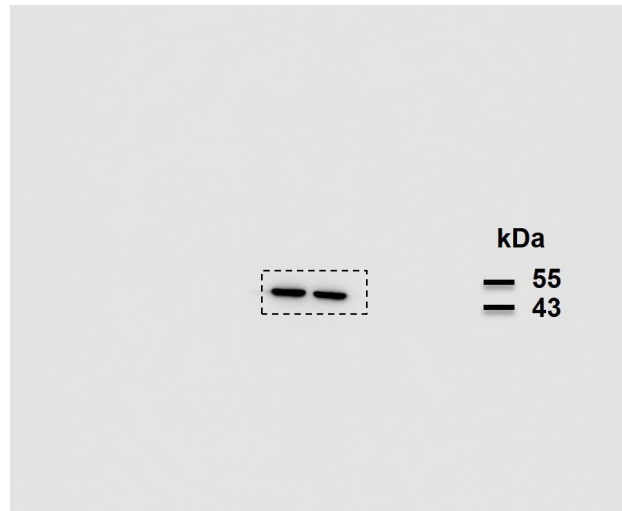

**GSK3 $\beta$**

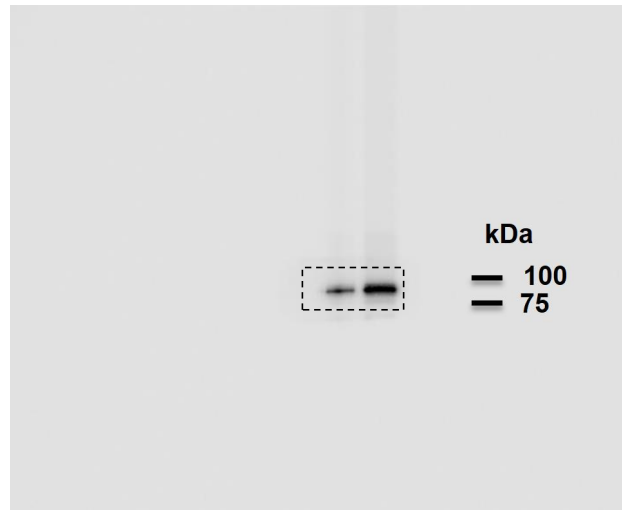

**$\beta$ -catenin**

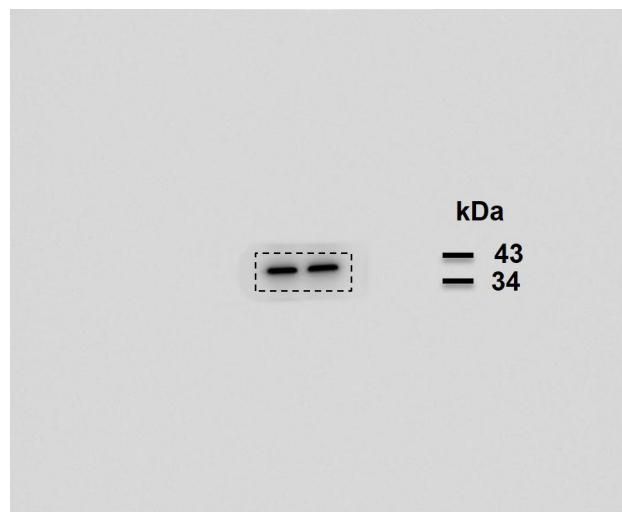

**$\beta$ -actin**

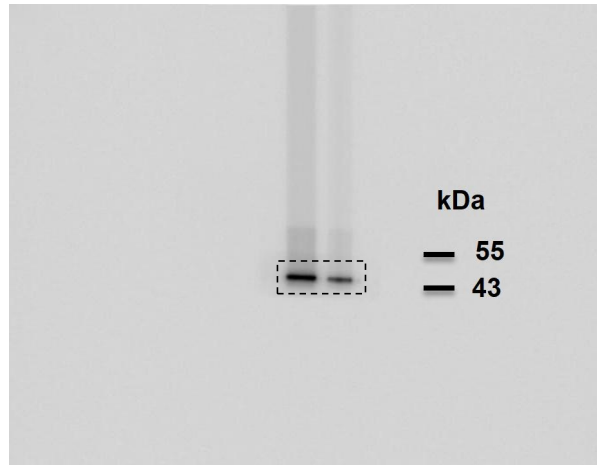

**pGSK3β**

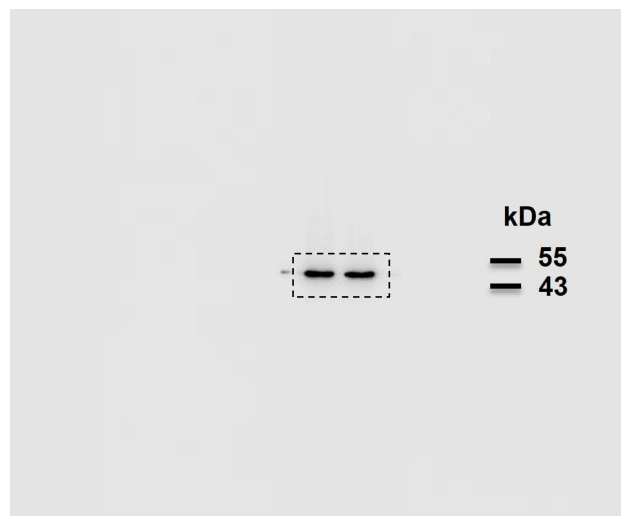

**GSK3β**

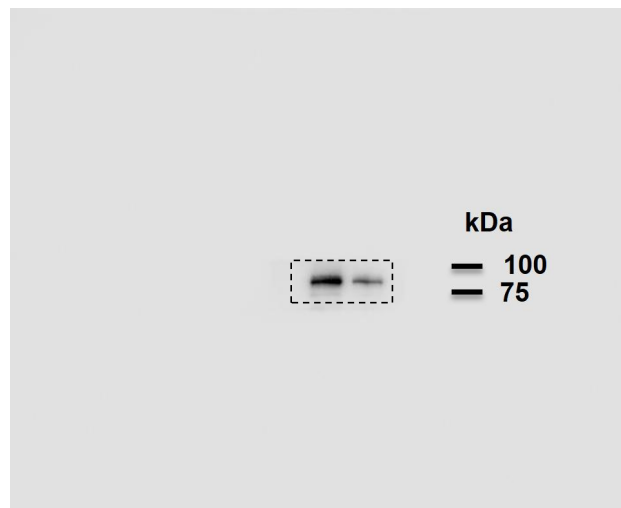

**β-catenin**

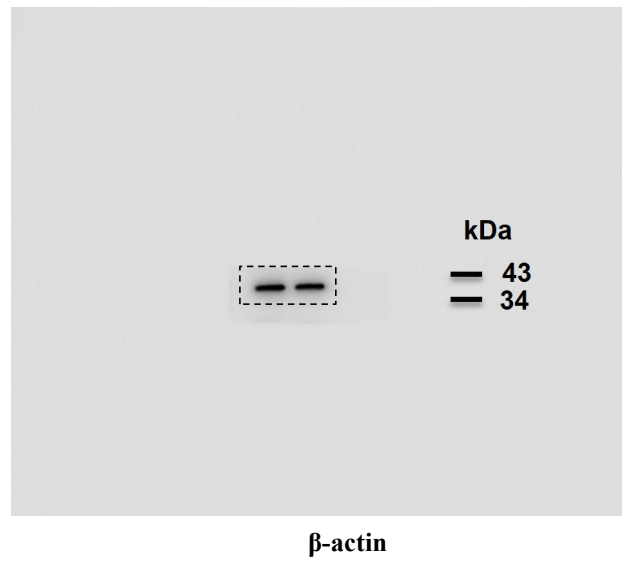

**Supplementary Figure S14.** The original immunoblots of Figure 6E.

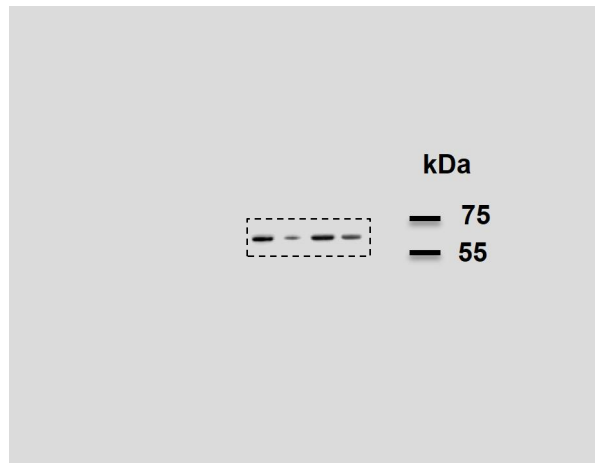

**CARM1**

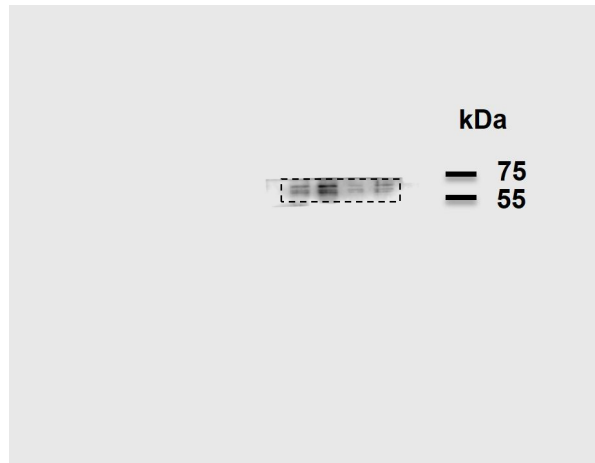

**PRKACA**

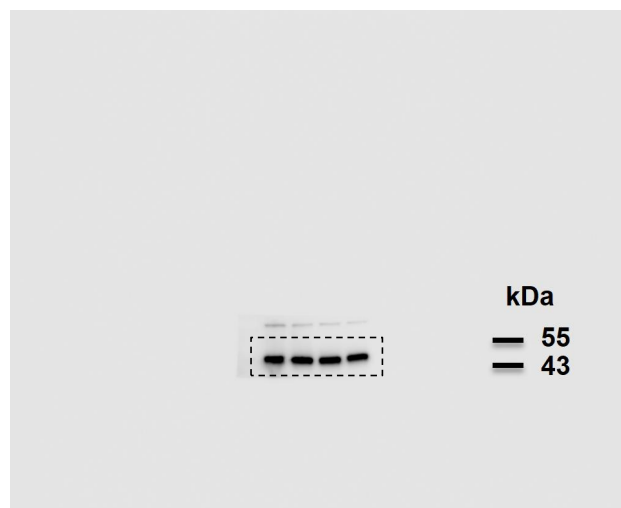

**GSK3β**

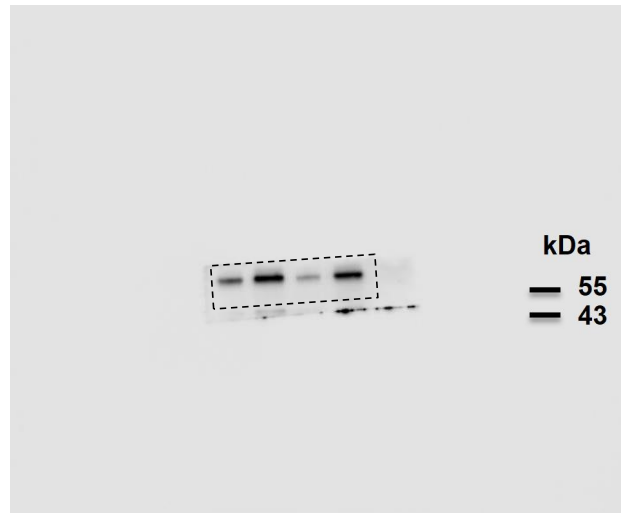

pGSK3β

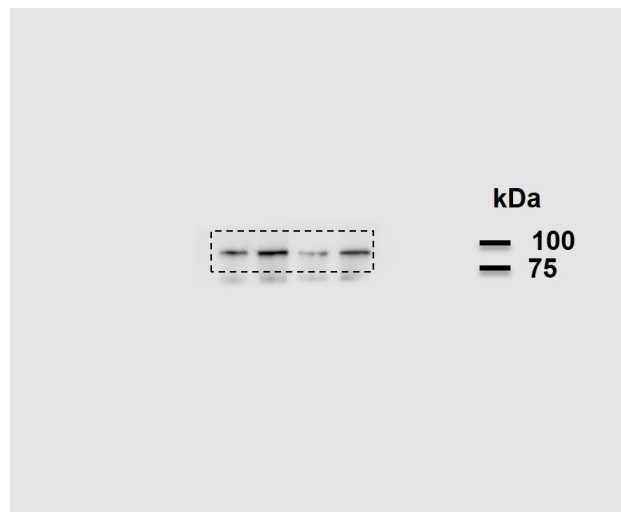

β-catenin

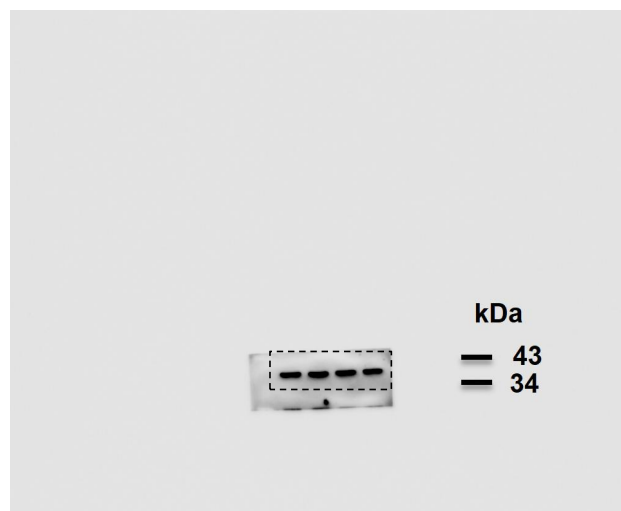

β-actin

**Supplementary Figure S15.** The original immunoblots of Figure 6G.

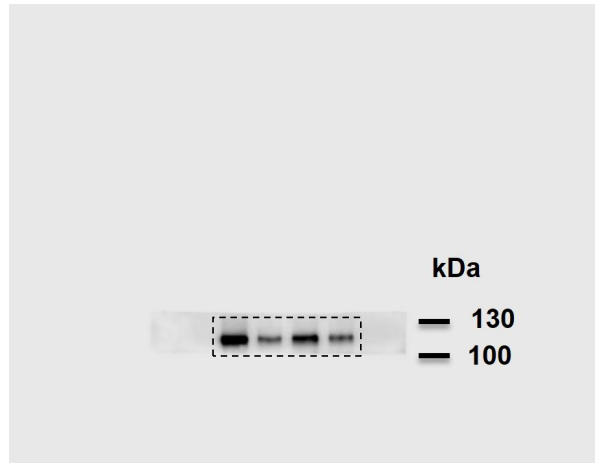

**RBM5**

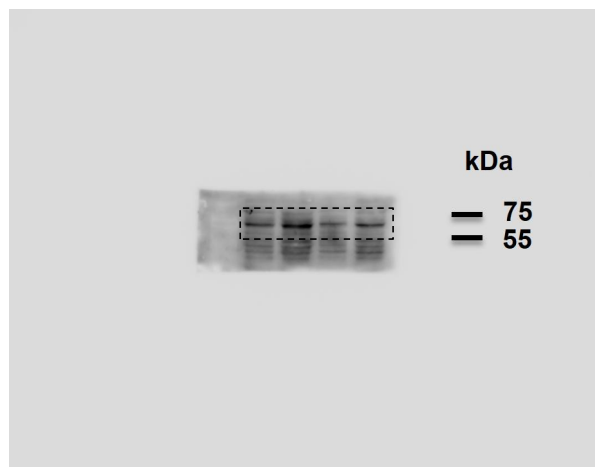

**PRKACA**

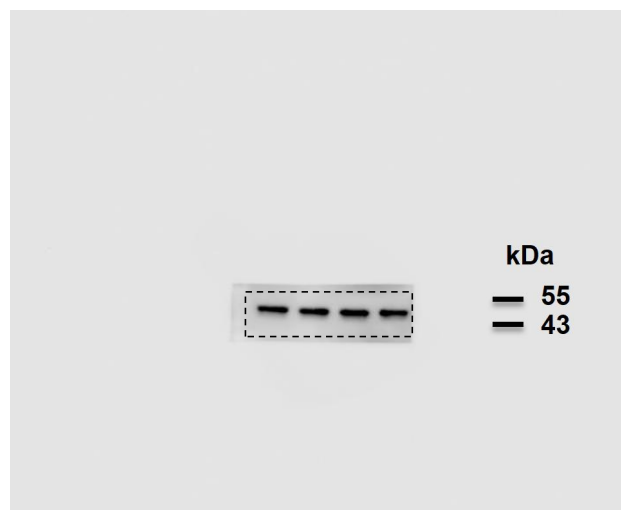

**GSK3β**



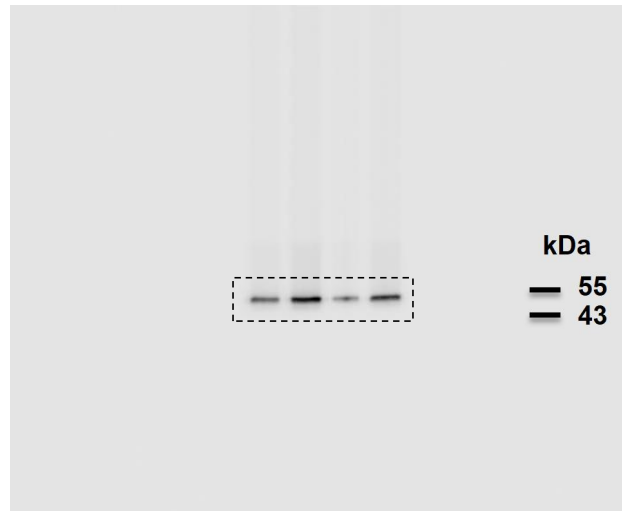

pGSK3 $\beta$

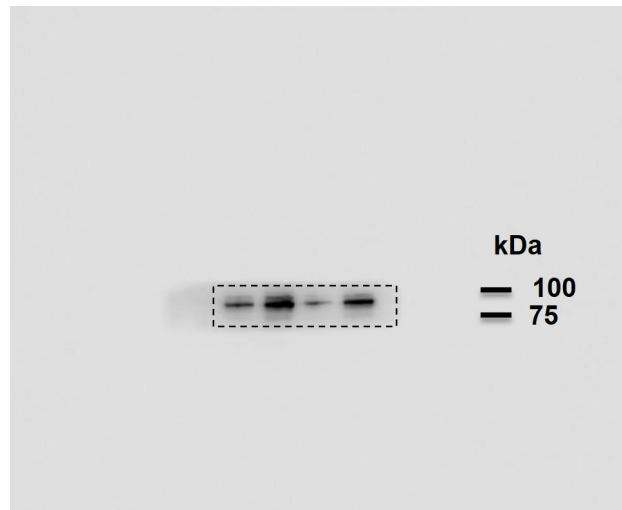

$\beta$ -catenin

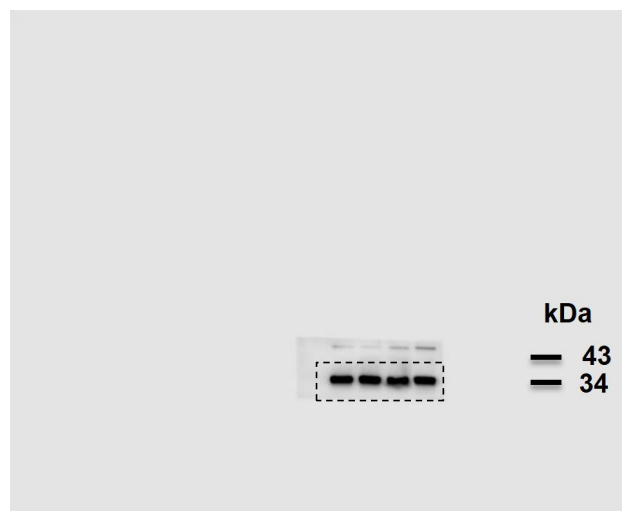

$\beta$ -actin

**Supplementary Figure S16.** The original immunoblots of Figure 6I.

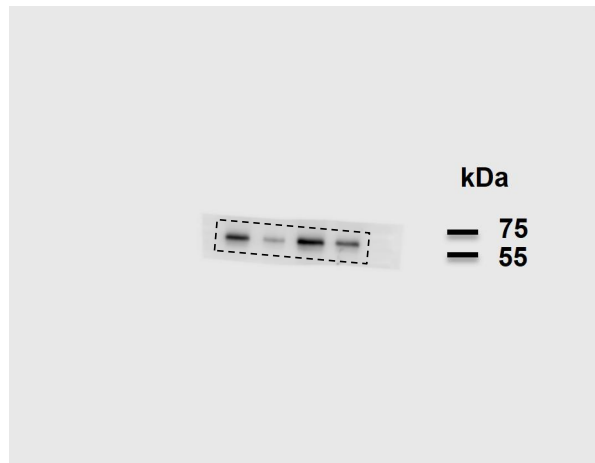

**PRKACA**

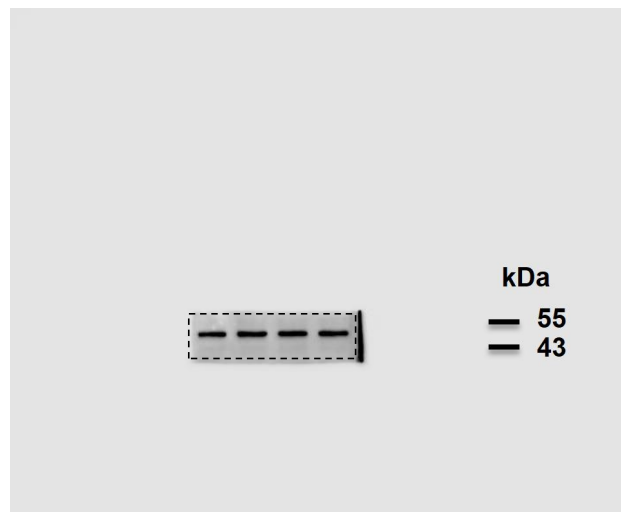

**GSK3 $\beta$**

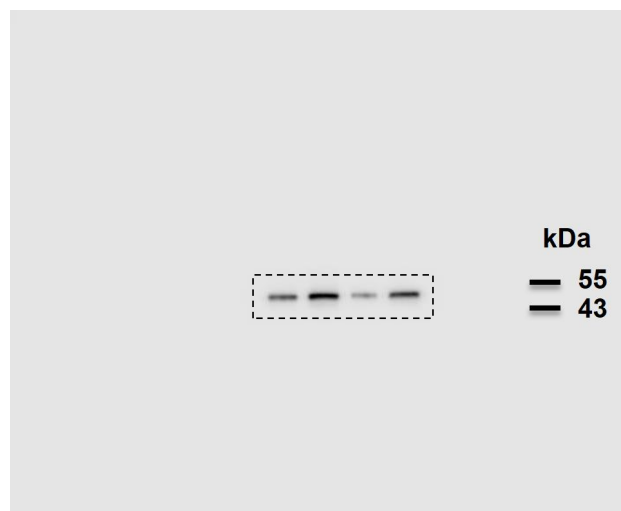

**pGSK3 $\beta$**

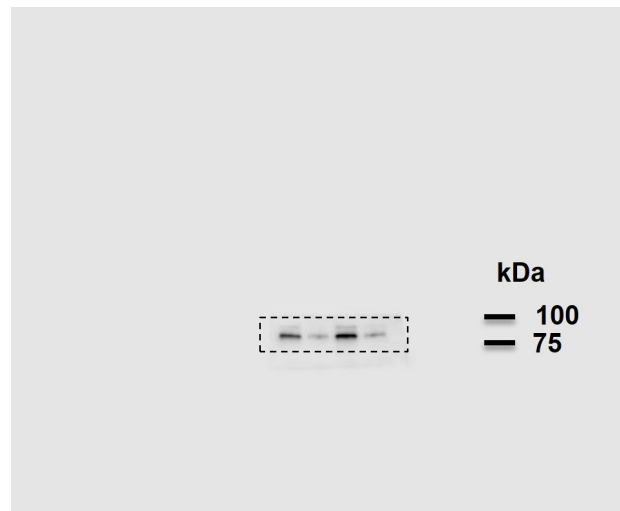

$\beta$ -catenin

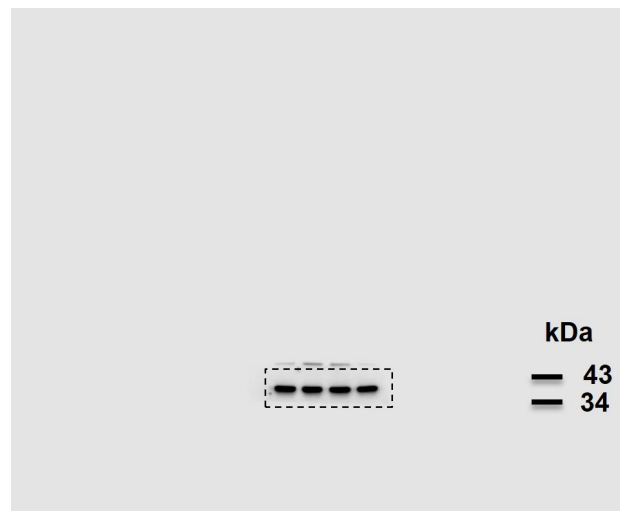

$\beta$ -actin

**Supplementary Figure S17.** The original immunoblots of Figure 6K.

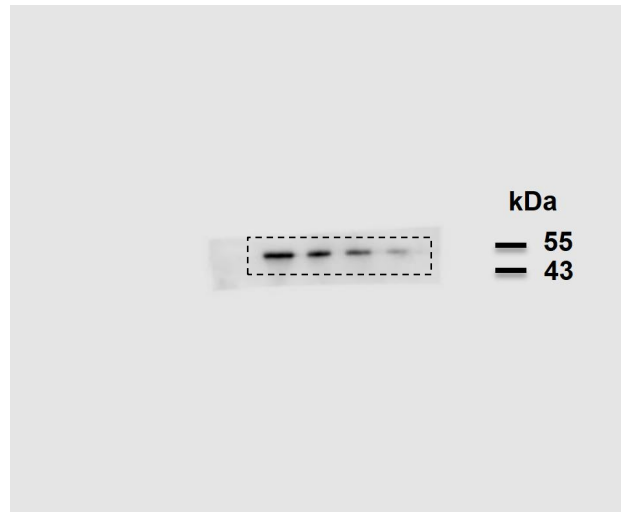

**pGSK3 $\beta$**

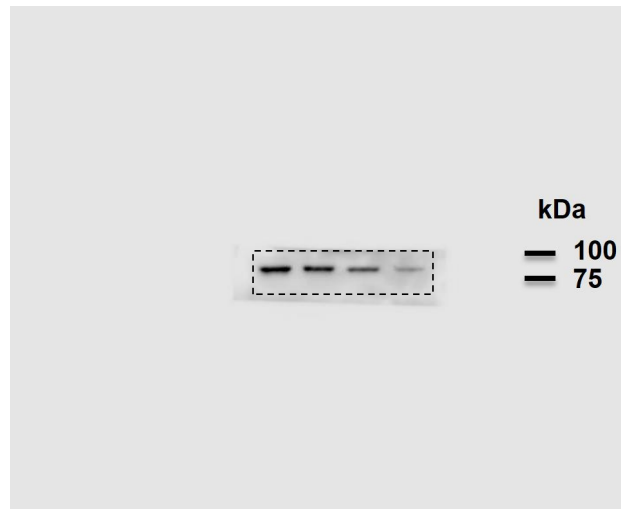

**$\beta$ -catenin**

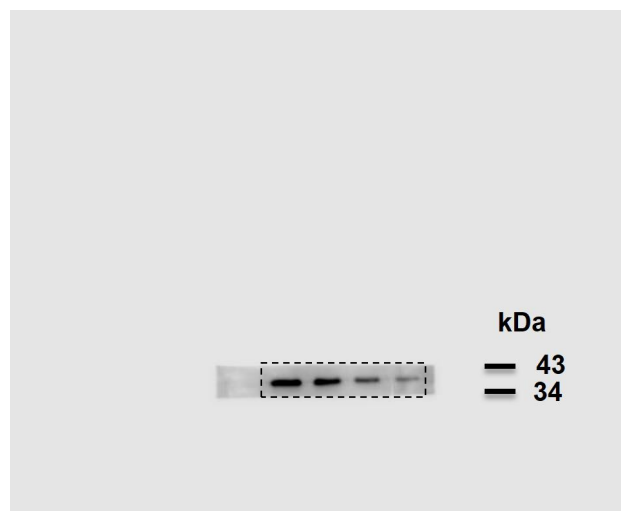

**CDK4**

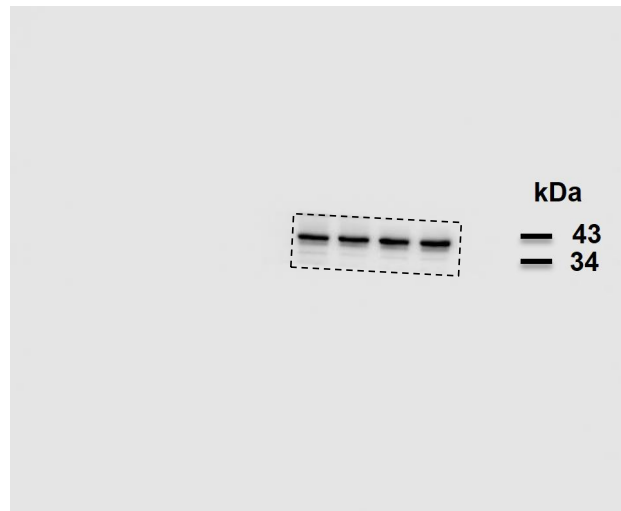

$\beta$ -actin

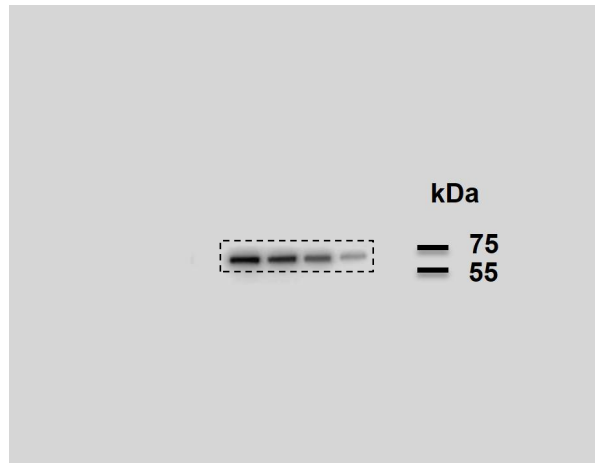

PRKACA

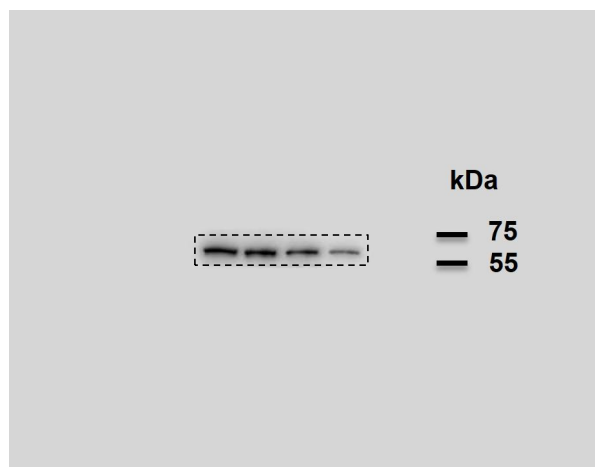

CARM1

**Supplementary Figure S18.** The original immunoblots of Figure 7E.
