# Supplementary material for: Downregulated RBM5 Enhances CARM1 Expression and Activates the PRKACA/GSK3β Signaling Pathway through Alternative Splicing-Coupled Nonsense-Mediated Decay
Source: MDPI journal article supplement (doi:10.3390/cancers16010139), 2023-12-27

## CV of all authors

**Yan-ping Zhang**, Ph.D, Department of Urology, the Second Hospital of Hebei Medical University, Shijiazhuang, Hebei, 050011, PR China.

Email: zhangyanping@hebmuh.edu.cn. Tel: +86-0311-66002996

**Fang Li**, Ph.D, Third Division, Department of Cardiology, The Second Hospital of Hebei Medical University, Shijiazhuang, Hebei, 050011, PR China.

Email: lifangfei3320@yeah.net. Tel: +86-0311-66003981

**Zhen-wei Han**, Ph.D, Department of Urology, the Second Hospital of Hebei Medical University, Shijiazhuang, Hebei, 050011, PR China.

Email: hanzhenwei@hebmuh.edu.cn. Tel: +86-0311-66002996

**Zhi-hai Teng**, M.D, Department of Urology, the Second Hospital of Hebei Medical University, Shijiazhuang, Hebei, 050011, PR China.

Email: tengzhihai1988@126.com. Tel: +86-0311-66002996

**Cheng-gen Jin**, Ph.D, Department of Urology, the Second Hospital of Hebei Medical University, Shijiazhuang, Hebei, 050011, PR China.

Email: 29005698@hebmuh.edu.cn. Tel: +86-0311-66002996

**Hao Yuan**, B.S, Department of Urology, the Second Hospital of Hebei Medical University, Shijiazhuang, Hebei, 050011, PR China.

Email: 1490882758@qq.com. Tel: +86-0311-66002996

**Si-hao Zhang**, B.S, Department of Urology, the Second Hospital of Hebei Medical University, Shijiazhuang, Hebei, 050011, PR China.

Email: 3223140950@qq.com. Tel: +86-0311-66002996

**Ke-xin Sun**, B.S, Department of Urology, the Second Hospital of Hebei Medical University, Shijiazhuang, Hebei, 050011, PR China.

Email: 506031387@qq.com. Tel: +86-0311-66002996

**Ya-xuan Wang**, Ph.D, Department of Urology, the Second Hospital of Hebei Medical University, Shijiazhuang, Hebei, 050011, PR China.

Email: 27000413@hebmuh.edu.cn. Tel: +86-0311-66002996

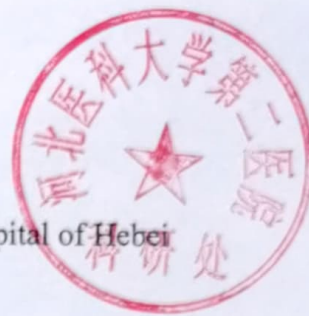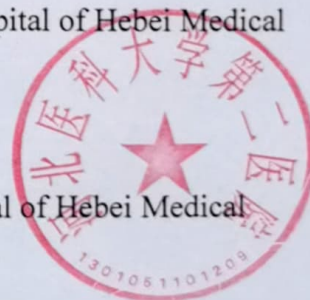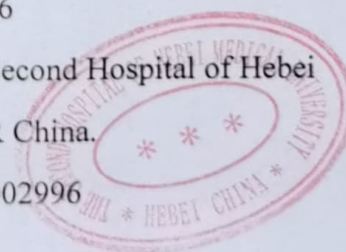

Supplement: s1 [file s1]
